# Supplementary material for: Nanopore sequencing of native adeno-associated virus (AAV) single-stranded DNA using a transposase-based rapid protocol
Source: PubMed Central journal article supplement — NAR Genom Bioinform. 2020 Sep 28;2(4):lqaa074. doi: 10.1093/nargab/lqaa074 (PMC7671332; doi:10.1093/nargab/lqaa074), 2020-09-28
Supplement: lqaa074_supplemental_file.pdf [file lqaa074_supplemental_file.pdf]

## Supplementary Information

### Nanopore sequencing of native Adeno-associated virus single-stranded DNA using a transposase-based rapid protocol

Marco T. Radukic<sup>1,†</sup>, David Brandt<sup>2,†</sup>, Markus Haak<sup>2</sup>, Kristian M. Müller<sup>1,\*</sup> and Jörn Kalinowski<sup>2,\*</sup>

<sup>1</sup> Faculty of Technology, Bielefeld University, 33594 Bielefeld, Germany

<sup>2</sup> Center for Biotechnology (CeBiTec), Bielefeld University, 33594 Bielefeld, Germany

\* To whom correspondence should be addressed: Jörn Kalinowski; Tel: +49 521 106 8756; Fax: +49 521 106 89041; Email: joern@cebitec.uni-bielefeld.de or Kristian Müller. Tel: +49 521 106 6323; Fax: +49 521 106 156318; Email: kristian@syntbio.net

† These authors contributed equally to this work.

## Contents

|     |                                                             |    |
|-----|-------------------------------------------------------------|----|
| 1   | Methods .....                                               | 1  |
| 1.1 | Production of M13KO7 helper phage .....                     | 1  |
| 1.2 | qPCR assay .....                                            | 1  |
| 2   | Script for the simulation of the transposase reaction ..... | 7  |
| 3   | Transposase adapter sequences.....                          | 8  |
| 4   | Supplementary Figures .....                                 | 8  |
|     | Supplementary Figure S1 .....                               | 8  |
|     | Supplementary Figure S2 .....                               | 9  |
|     | Supplementary Figure S3: .....                              | 10 |
|     | Supplementary Figure S4 .....                               | 11 |
|     | Supplementary Figure S5 .....                               | 11 |
|     | Supplementary Figure S6 .....                               | 12 |
|     | Supplementary Figure S7 .....                               | 12 |
|     | Supplementary Figure S8 .....                               | 13 |
|     | Supplementary Figure S9 .....                               | 14 |
|     | Supplementary Figure S10 .....                              | 15 |
|     | Supplementary Figure S11 .....                              | 16 |
|     | Supplementary Figure S12 .....                              | 17 |
|     | Supplementary Figure S13 .....                              | 17 |
|     | Supplementary Figure S14 .....                              | 18 |
|     | Supplementary Figure S15 .....                              | 19 |

## 1 Methods

### 1.1 Production of M13KO7 helper phage

*E. coli* ER2738 from an over-night culture were used to inoculate lysogeny broth (LB) supplemented with ampicillin (100 µg/ml) and tetracycline (25 µg/ml) to OD<sub>600</sub><sub>10mm</sub> = 0.1 and grown to OD<sub>600</sub><sub>10mm</sub> = 0.5 at 37 °C in Erlenmyer flasks on an orbital shaker. Next, the culture was infected with 4 × 10<sup>9</sup> pfu/ml M13KO7 (New England Biolabs) helper phage and further incubated for 1.5 hours. Kanamycin was added to a final concentration of 70 µg/ml and, after further four hours of incubation, the culture supernatant containing the phages was separated from cells by centrifugation. Phage ssDNA was prepared from the supernatant by the QIAprep Spin M13 Kit (Qiagen) as per the manufacturer's instructions. 6.2 µg ssDNA were obtained from a 3 ml preparation.

### 1.2 qPCR assay

We performed all qPCR measurements with primers and reagents according to the following tables. All dilution series for standard curves and primer dilutions were performed with sterile filtered Millipore MilliQ water in presence of 0.05% Pluronic F68. All pipetting was done with Sarstedt Biosphere low retention filter tips. Final primer concentration was

125 nM. The reaction volume was 20  $\mu$ l in 96 well Sarstedt Lightcycler plates. Quantification cycles were determined with the Roche 2<sup>nd</sup> derivative Max algorithm within the LightCycler 480 software, release 1.5.0 SP4, version 1.5.0.39.

All measurements were performed in technical duplicates. Sample DNA was extracted as described in the methods section and further diluted for the assay with MilliQ water containing 0.05% Pluronic F68. Nucleic acid quantification of AAV producer plasmids for standard curve preparation was performed spectroscopically with a Nanodrop 2000c. The ratio OD260/OD280 was between 1.85 and 1.88.

Table 1: Primer sets used for qPCR measurement.

| Target                                                     | Primer sequences                                  | Amplicon length | qPCR program | Primer efficiency | Linear range                                      | Limit of detection   |
|------------------------------------------------------------|---------------------------------------------------|-----------------|--------------|-------------------|---------------------------------------------------|----------------------|
| CMV promoter                                               | 5'-GGGACTTTCCTACTTGGCA<br>5'-GGCGGAGTTGTTACGACA   | 200 bp          | A            | 1.84              | 10 <sup>3</sup> – 10 <sup>9</sup><br>per reaction | <10 <sup>3</sup> , * |
| AAV serotype 2 Rep                                         | 5'-CGGAGAAGCAGTGGATCCA<br>5'-ATTTGGGACCGCGAGTTG   | 76 bp           | B            | 1.82              | 10 <sup>3</sup> – 10 <sup>9</sup><br>per reaction | <10 <sup>3</sup> , * |
| Adenovirus gene E4                                         | 5'-ACTACGTCCGGCGTTCCAT<br>5'-GGAGTGCGCCGAGACAAC   | 68 bp           | A            | 1.85              | 10 <sup>3</sup> – 10 <sup>9</sup><br>per reaction | <10 <sup>3</sup> , * |
| $\beta$ lactamase (Ampicillin resistance) gene, <i>bla</i> | 5'-CAACTTTATCCGCTCCATC<br>5'-AAGCCATACCAAACGACGAG | 138 bp          | A            | 1.91              | 10 <sup>3</sup> – 10 <sup>9</sup><br>per reaction | <10 <sup>3</sup> , * |

\* Standard error of regression method

Table 2: qPCR programs.

| qPCR program | Instrument, Assay                                | Master Mix                       | Program                                                                                                                              |
|--------------|--------------------------------------------------|----------------------------------|--------------------------------------------------------------------------------------------------------------------------------------|
| A            | Roche LightCycler 480II<br>SYBR-Green type assay | Promega GoTaq<br>qPCR Master Mix | a. 95 °C, 10 min.<br>b. 95 °C, 15 sec.<br>c. 60 °C, 1 min.<br>d. to b., 39x<br>e. 45 °C to 95 °C at 0.11 °C/sec                      |
| B            | Roche LightCycler 480II<br>SYBR-Green type assay | Promega GoTaq<br>qPCR Master Mix | a. 95 °C, 10 min.<br>b. 95 °C, 15 sec.<br>c. 55 °C, 15 sec.<br>d. 60 °C, 1 min.<br>e. to b., 39x<br>f. 45 °C to 95 °C at 0.11 °C/sec |

Table 3: Standard curves for qPCR primer sets

| Primer set | Fluorescence graph and melting curve                                                                                                                                                                                                                                                          | Standard curve                                                                                                                                                                                                                                                                                                      |
|------------|-----------------------------------------------------------------------------------------------------------------------------------------------------------------------------------------------------------------------------------------------------------------------------------------------|---------------------------------------------------------------------------------------------------------------------------------------------------------------------------------------------------------------------------------------------------------------------------------------------------------------------|
| CMV        | <p style="text-align: center;"><b>Amplification Curves</b></p> 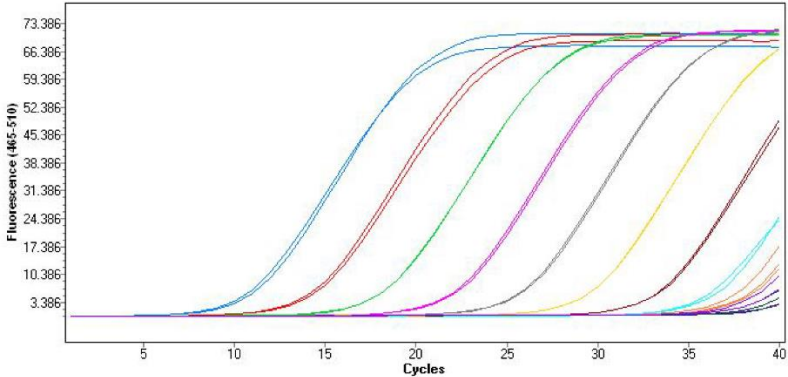 <p style="text-align: center;"><b>Melting Peaks</b></p>  |  <p>                     Error: 0.00849<br/>                     Efficiency: 1.840<br/>                     Slope: -3.775<br/>                     YIntercept: 43.59<br/>                     Link: 100.00                 </p> |

Rep

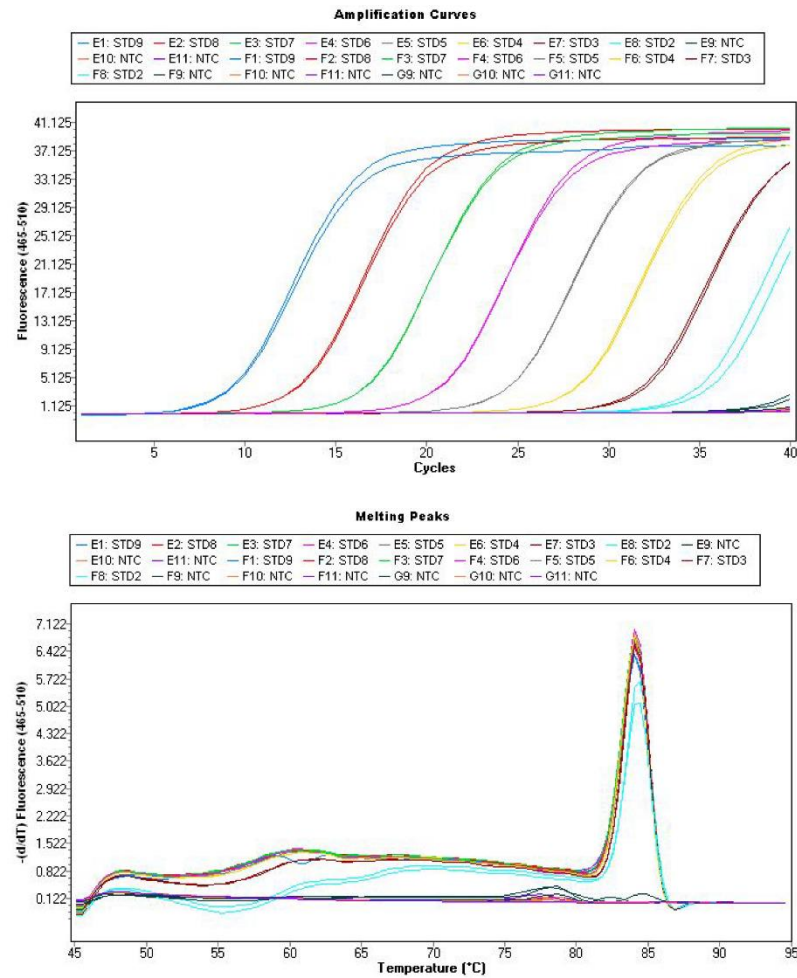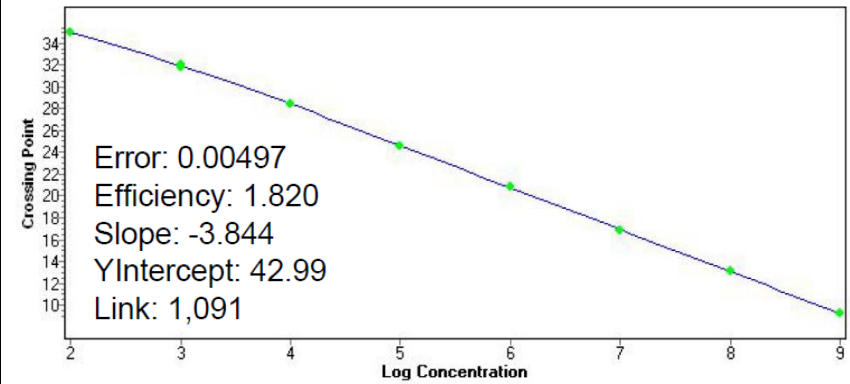

E4

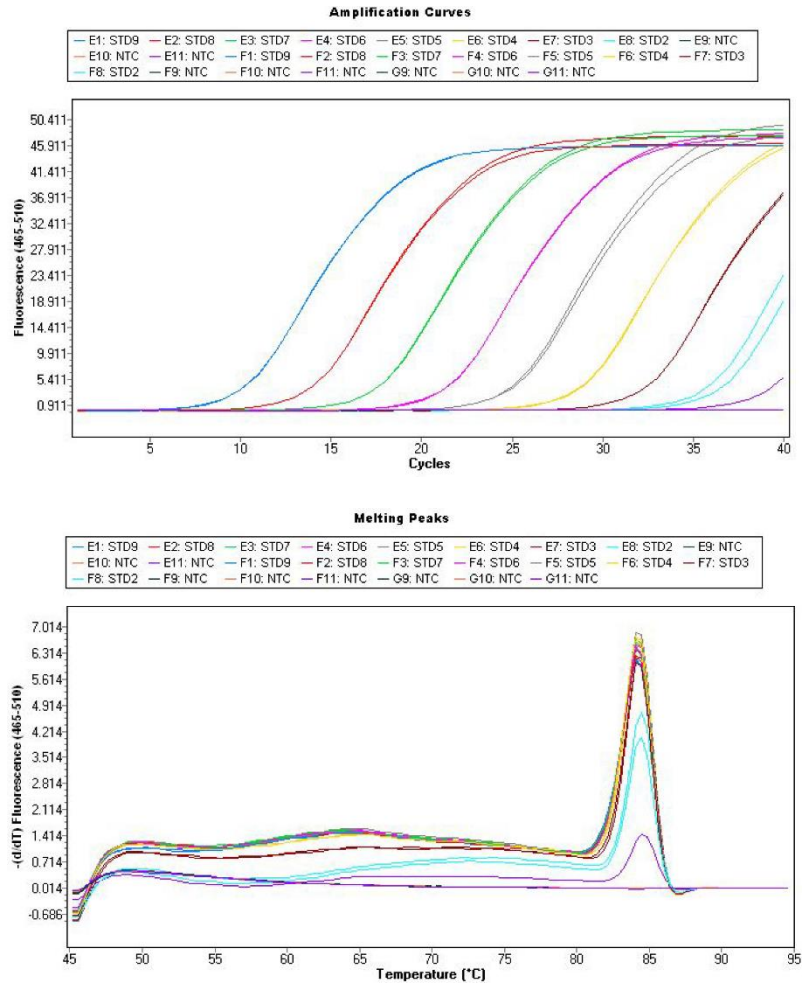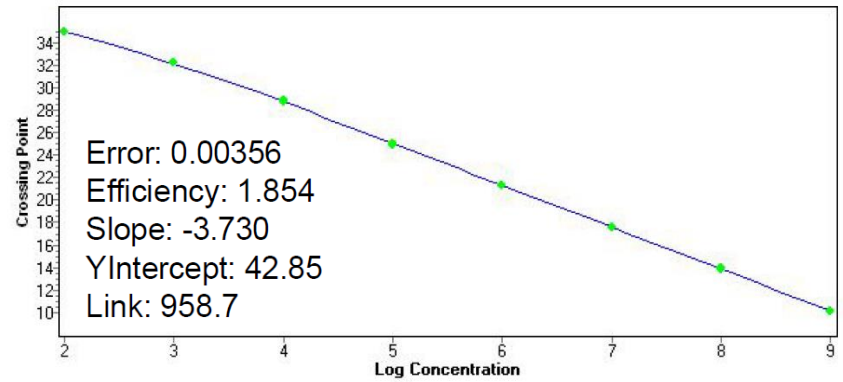

bla

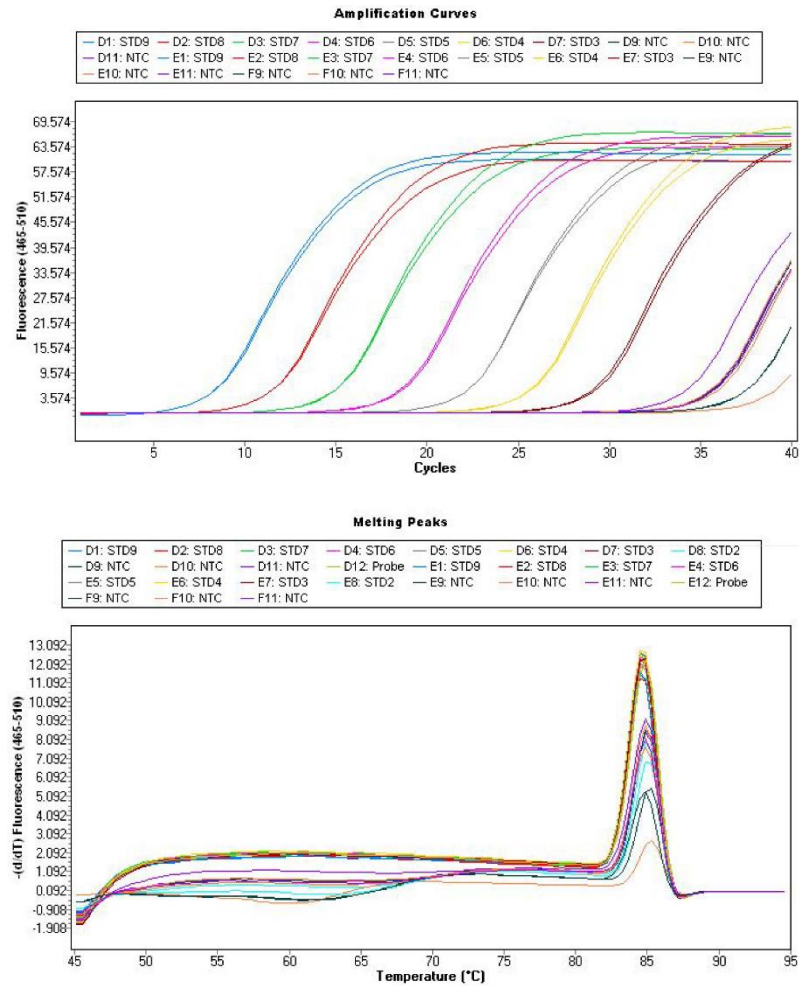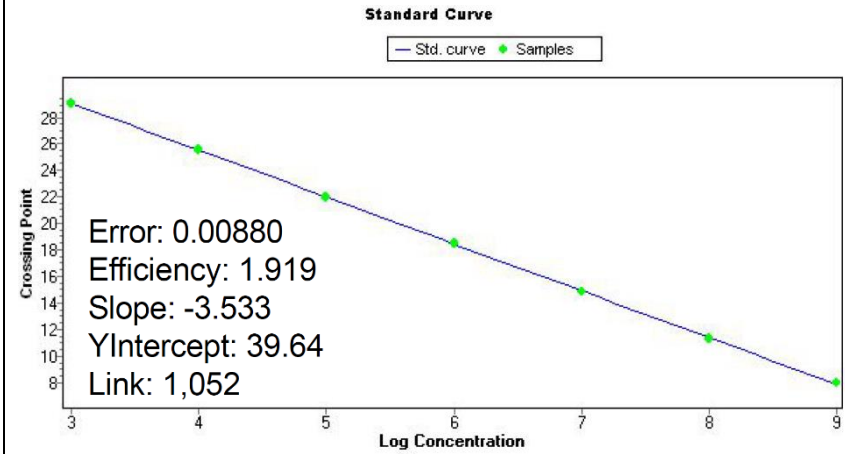

## 2 Script for the simulation of the transposase reaction

The following script was developed for and tested on GNU Octave 5.1.0. Sequences to be analysed can be put between the brackets in line 2. The script will output results to a graph and a text file in the user folder (under MS Windows).

```
1 #Input DNA Sequence
2 DNaseq="Put sequence of interest between brackets";
3 variants = length(DNaseq)-1;
4 r_m = ones (variants*2, 2);
5
6 #Basic conversions
7 DNaseq( DNaseq == "G" )="S";
8 DNaseq( DNaseq == "C" )="S";
9
10 #Calculate %GC upstream
11 for i = 1:variants
12     #length of DNA fragment
13     r_m([i], [1]) = variants-i+1;
14
15     #%GC
16     r_m([i], [2]) = columns(strfind(substr(DNaseq, i+1), "S")) / r_m([i], [1]) * 100;
17
18 endfor
19
20 #Calculate %GC downstream
21 for i = variants+1:rows(r_m)
22     #length of DNA fragment (same as above)
23     r_m([i], [1]) = i-variants;
24
25     #%GC
26     r_m([i], [2]) = columns(strfind(substr(fliplr(DNaseq), variants-i), "S")) /
27     r_m([i], [1]) * 100;
28 endfor
29
30 save results.mat r_m
31 plotmatrix(r_m)
```

### 3 Transposase adapter sequences

The following transposase adapter sequences were used for the realignment of untrimmed reads in order to estimate transposition sites:

Samples M13mp18 ssDNA and M13KO7 ssDNA:

5'-GCTTGGGTGTTTAACTTCAGGGAACAAACCAAGTTACGTGTTTTTCGCATTTATCGTGAAACG  
CTTTCGCGTTTTTCGTGCGCCGCTTCA

Sample M13mp18 phagemid dsDNA:

5'-GCTTGGGTGTTTAAACCAACTAGGCACAGCGAGTCTTGGTTGTTTTTCGCATTTATCGTGAAAC  
GCTTTCGCGTTTTTCGTGCGCCGCTTCA

AAV sample 2 (run 2):

5'-GCTTGGGTGTTTAAACCGTTTTTCGCATTTATCGTGAAACGCTTTCGCGTTTTTCGTGCGCCGCTTCA

### 4 Supplementary Figures

Supplementary Figure S1

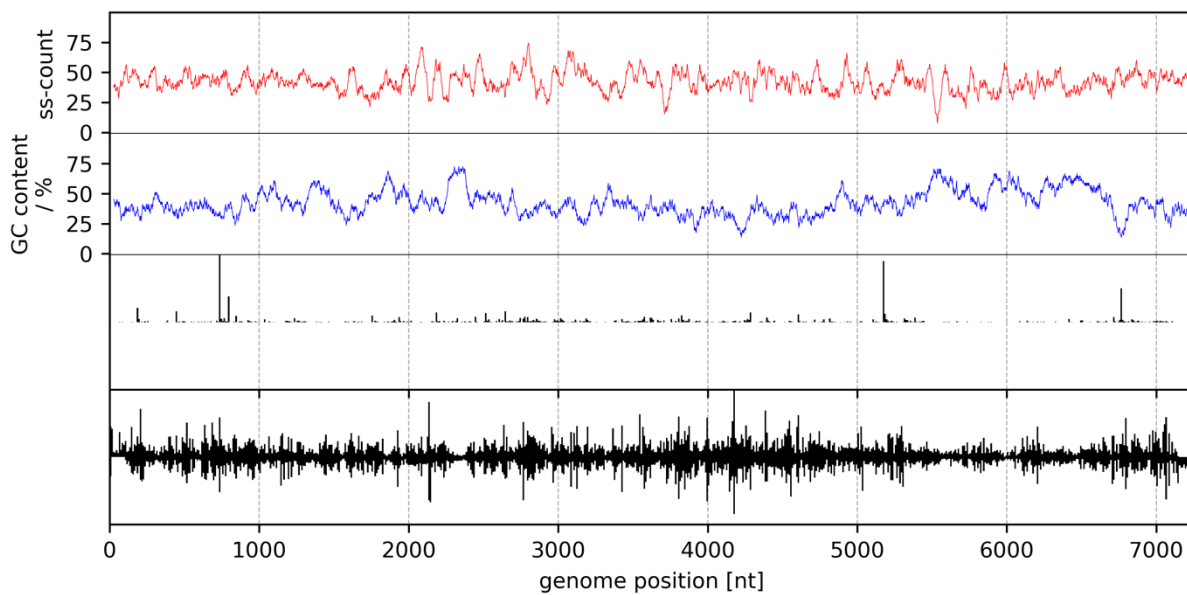

**Supplementary Figure S1.** Plus strand ss-count, GC content and relative transposase insertion sites of samples M13mp18 ssDNA (top) and M13mp18 dsDNA (bottom). The ss-count is based on 100 predicted DNA folding structures. Both ss-count and GC content are averaged over a moving window of 50 nt. The estimated read starts are binned in 15 nt bins and normalized to the maximal bin count.



## Supplementary Figure S2

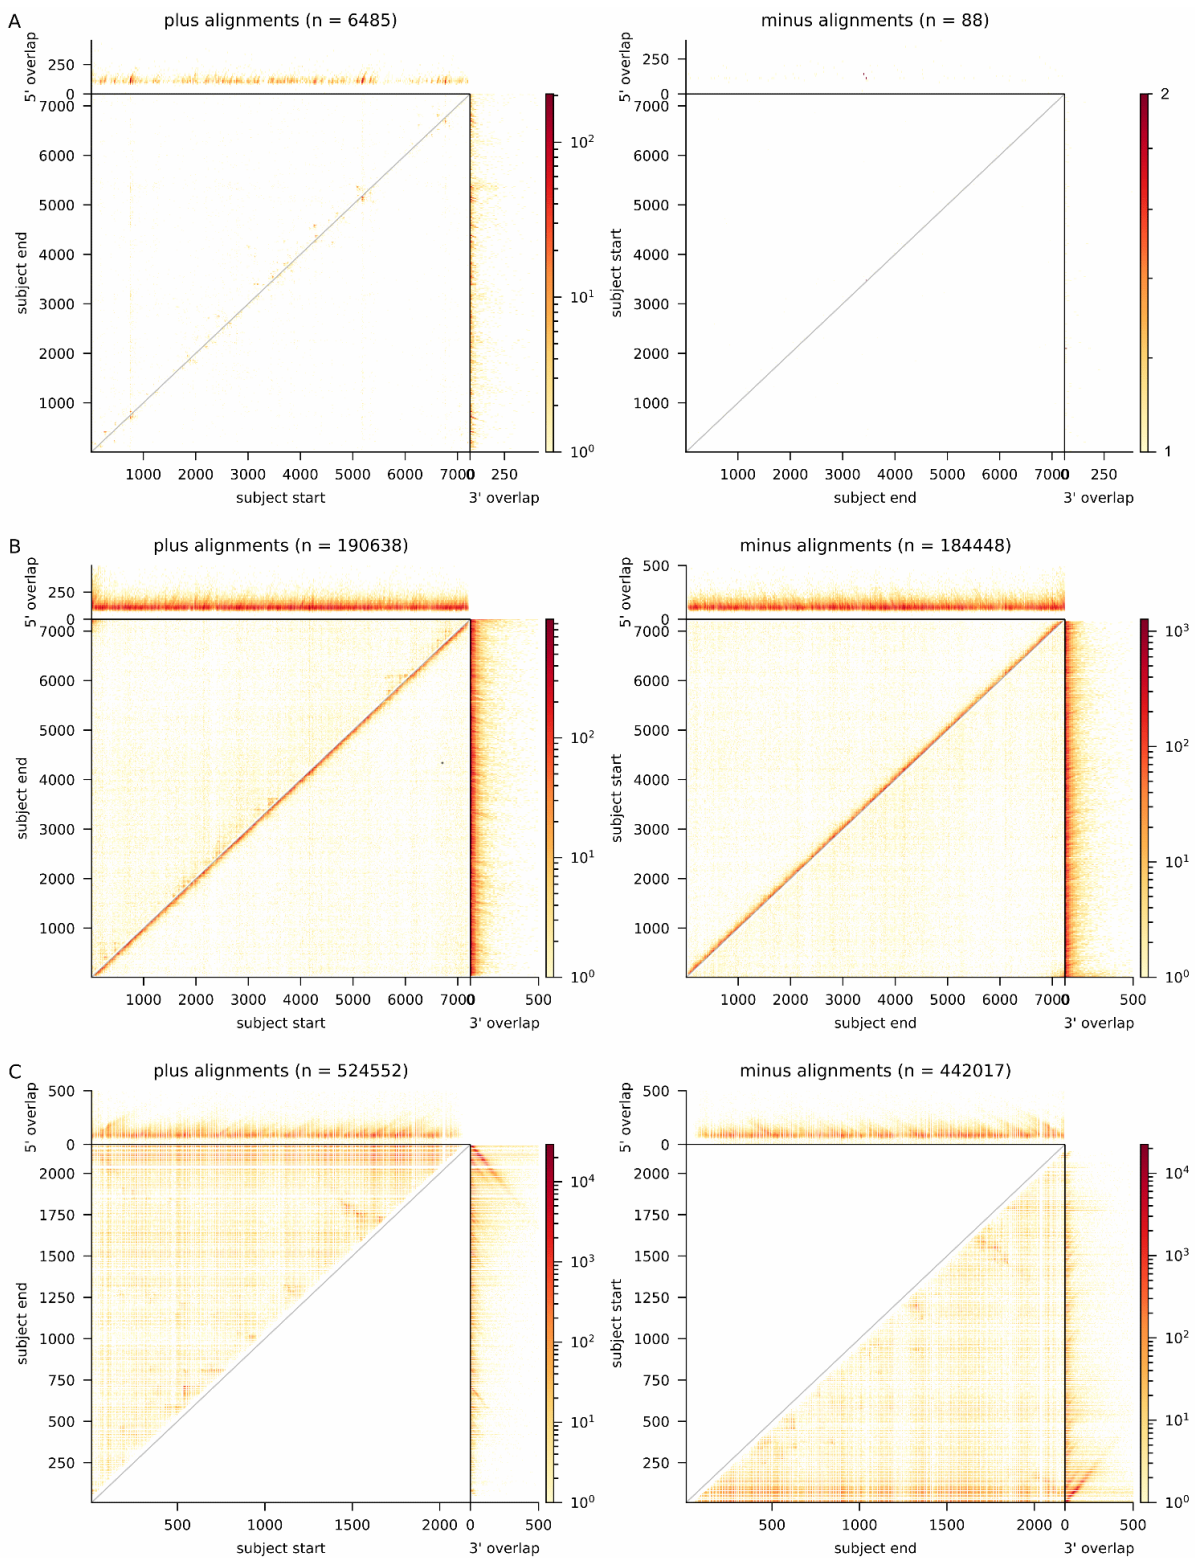

**Supplementary Figure S2.** Binned subject start and end positions for untrimmed reads mapped against ssM13 (A), dsM13 (B) and rAAV (C) genomes. Bins are sized 15 x 15 nt for ssM13 and dsM13 and 5 x 5 nt for rAAV. The length of unmapped stretches of reads is plotted as 5' overhang and 3' overhang, respectively. Read count per bin is scaled logarithmically.

Supplementary Figure S3:

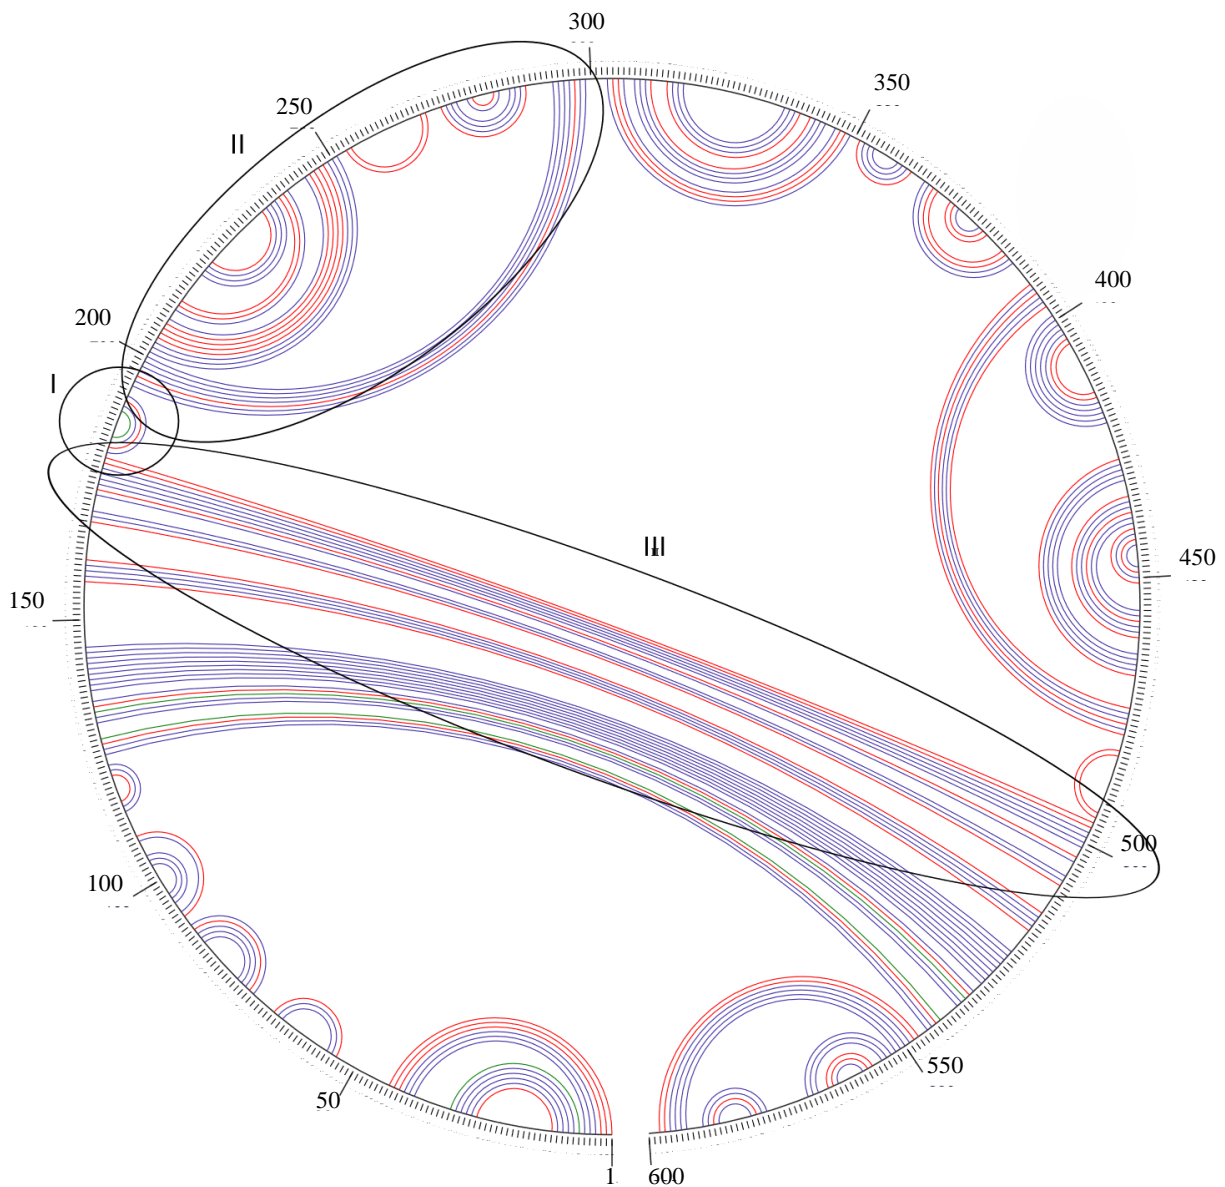

M13mp18 4,100 - 4,700 bp (dG = -105.60)

**Supplementary Figure S3.** Circular structure plot of predicted folding from base 4100 to 4700 of M13mp18 genomic DNA. Structure prediction carried out using `mfold_util 4.7` with standard options. Possible hairpin loops serving as targets for transposase insertion are highlighted.

## Supplementary Figure S4

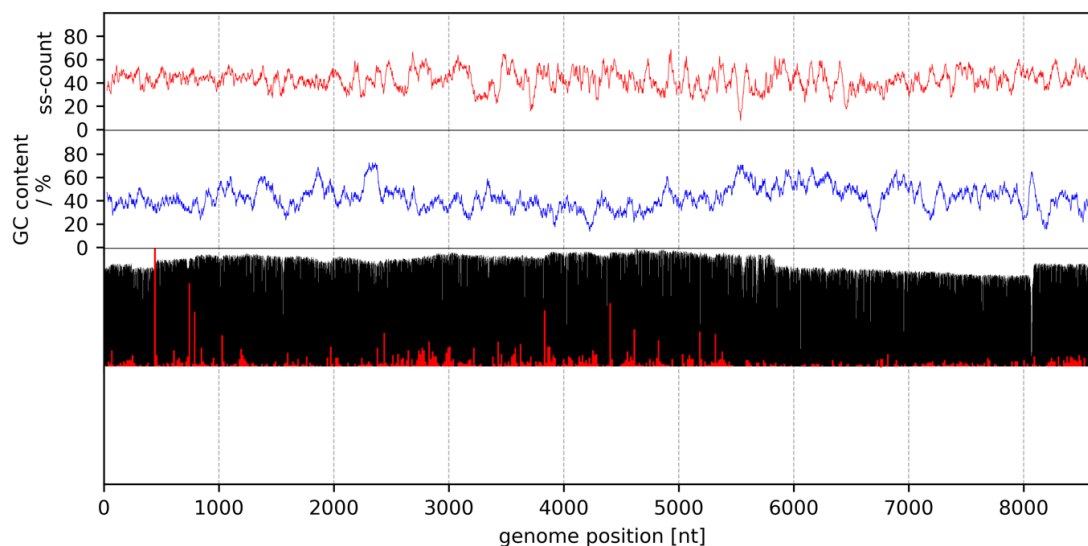

**Supplementary Figure S4.** Plus strand ss-count, GC content, relative coverage and relative transposase insertion sites of sample M13KO7 ssDNA. The ss-count is based on 100 predicted DNA folds. Both ss-count and GC content are averaged over a moving window of 50 nt. The estimated read starts are binned in 15 nt bins and normalized to the maximal bin count.

## Supplementary Figure S5

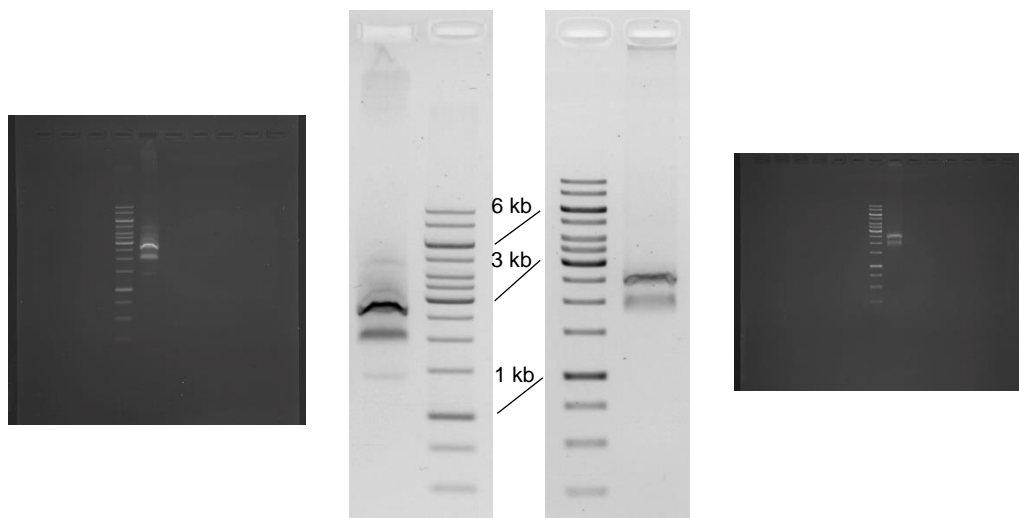

**Supplementary Figure S5.** Agarose gel electrophoresis of DNA prepared from rAAV sample 1 used for multiplexed sequencing (run 1). Both gels show a 5  $\mu$ l sample from the same preparation before (left) and after a freeze-thaw cycle. The gel was 1% agarose in TAE buffer, run at 120 V for 50 min. Staining by SYBR Gold nucleic acid stain (Thermo). The marker was Gene Ruler 1 kb (Thermo). Gels displayed with inverted colors and spread histograms. Uncropped gels are given. The unfrozen sample shows three distinct bands. One band runs below the expected genome size of 2.2 kb. One runs right at the expected size and one runs between 2.5 and 3 kb. Upon freeze-thawing, we observe that the smallest fragment disappears, and aggregates are seen at the sample pocket, whereas the other bands are preserved. We hypothesize that the smallest fragment resembles true single-stranded genomes, while the band of the expected size resembles two at least partly hybridized genomes. Facilitated hybridization of ssDNA oligos by freeze-thaw cycles has been observed before (Elghanian et al., 1997, Science, DOI: 10.1126/science.277.5329.1078 ). Higher order non-covalent multimers seem also to be present. Under the investigated conditions as estimated from the band intensities, a larger part of the sample appears to be in hybridized states.

## Supplementary Figure S6

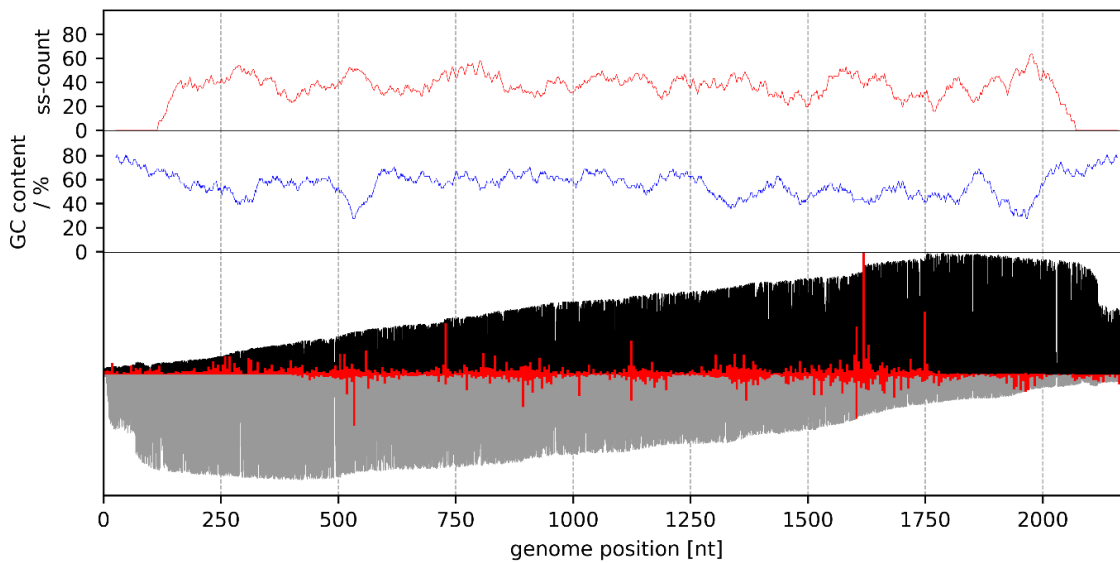

**Supplementary Figure S6.** Plus strand ss-count, GC content, relative coverage and relative transposition sites of sample rAAV (run 2). The ss-count is based on 100 predicted DNA folds. Both ss-count and GC content are averaged over a moving window of 50 nt. The estimated read starts are binned in 5 nt bins and normalized to the maximal bin count.

## Supplementary Figure S7

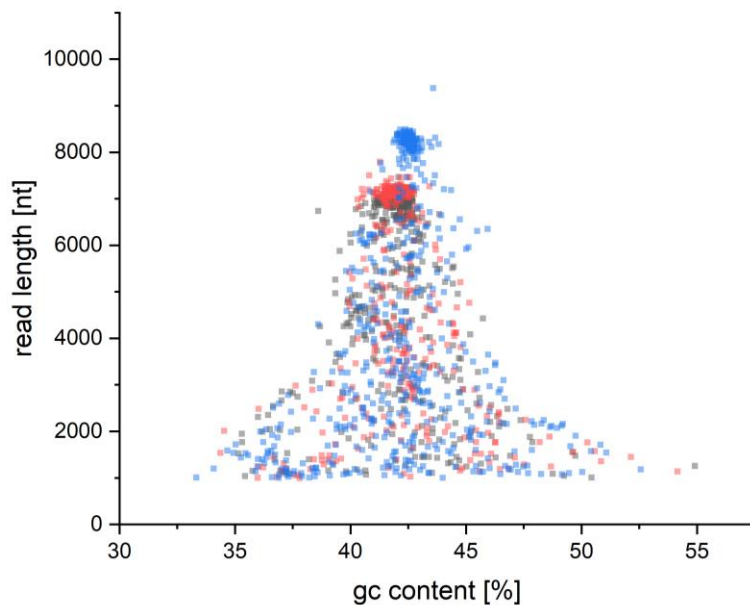

**Supplementary Figure S7.** GC content *versus* read length for a commercial M13mp18 dsDNA phagemid (grey, partially overlaid by red) and M13mp18 ssDNA (M13mp18, red), as well as M13 in-house propagated helper phage (blue). Most reads are of similar length and GC content, indicating that an individual molecule is only fragmented once by the transposase. Conical tailing to minor extends hints on premature sequencing breakoffs and the prevalence of double-cut genomes.

## Supplementary Figure S8

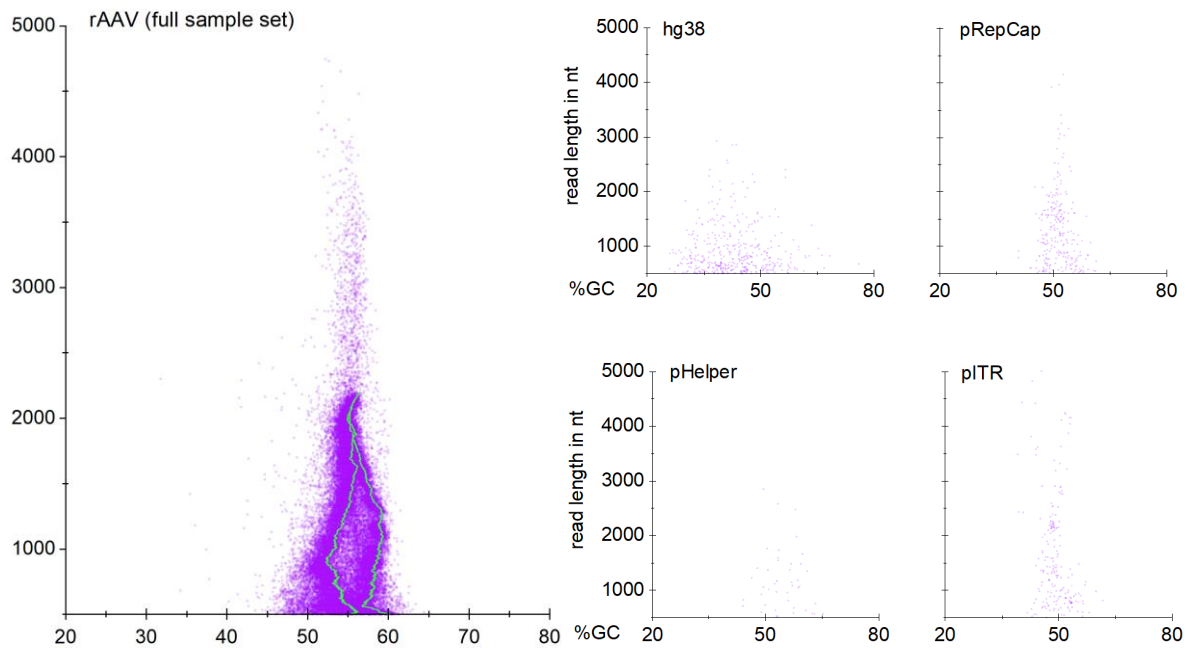

**Supplementary Figure S8.** GC content *versus* read length for the multiplexed AAV sequencing run, grouped by BLAST assignments to the reference library. One magenta dot represents on read. Of all 36239 reads that passed the quality threshold of >500 nt, 52 (0.14%) were longer than 5000 nt, 51 of which fell into the pITR bin. This finding highlights the importance of complete Benzonase digest prior to capsid disruption. Additionally, the data indicates that oversized reads likely stem from the pITR backbone instead of genome multimers or the other producer plasmids.

## Supplementary Figure S9

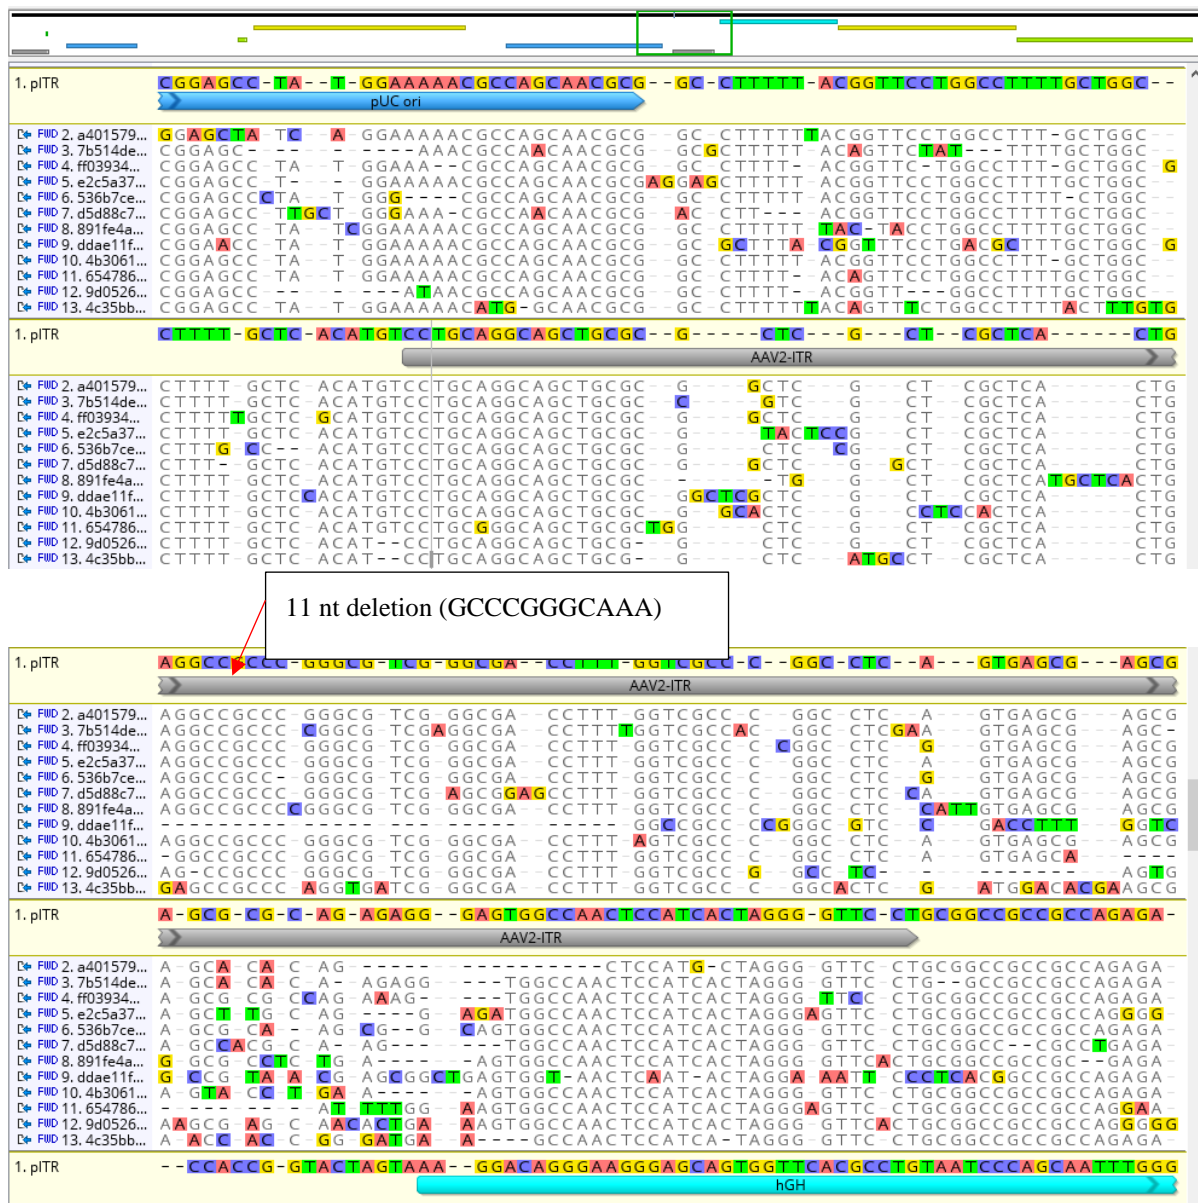

**Supplementary Figure S9.** 12 read examples aligned to the junction ITR between genome-backbone fusions are shown. Junction ITRs still harbour a 11 nt deletion and sequencing quality drops downstream of the ITR internal palindrome (12 read examples mapped to pITR).

Supplementary Figure S10

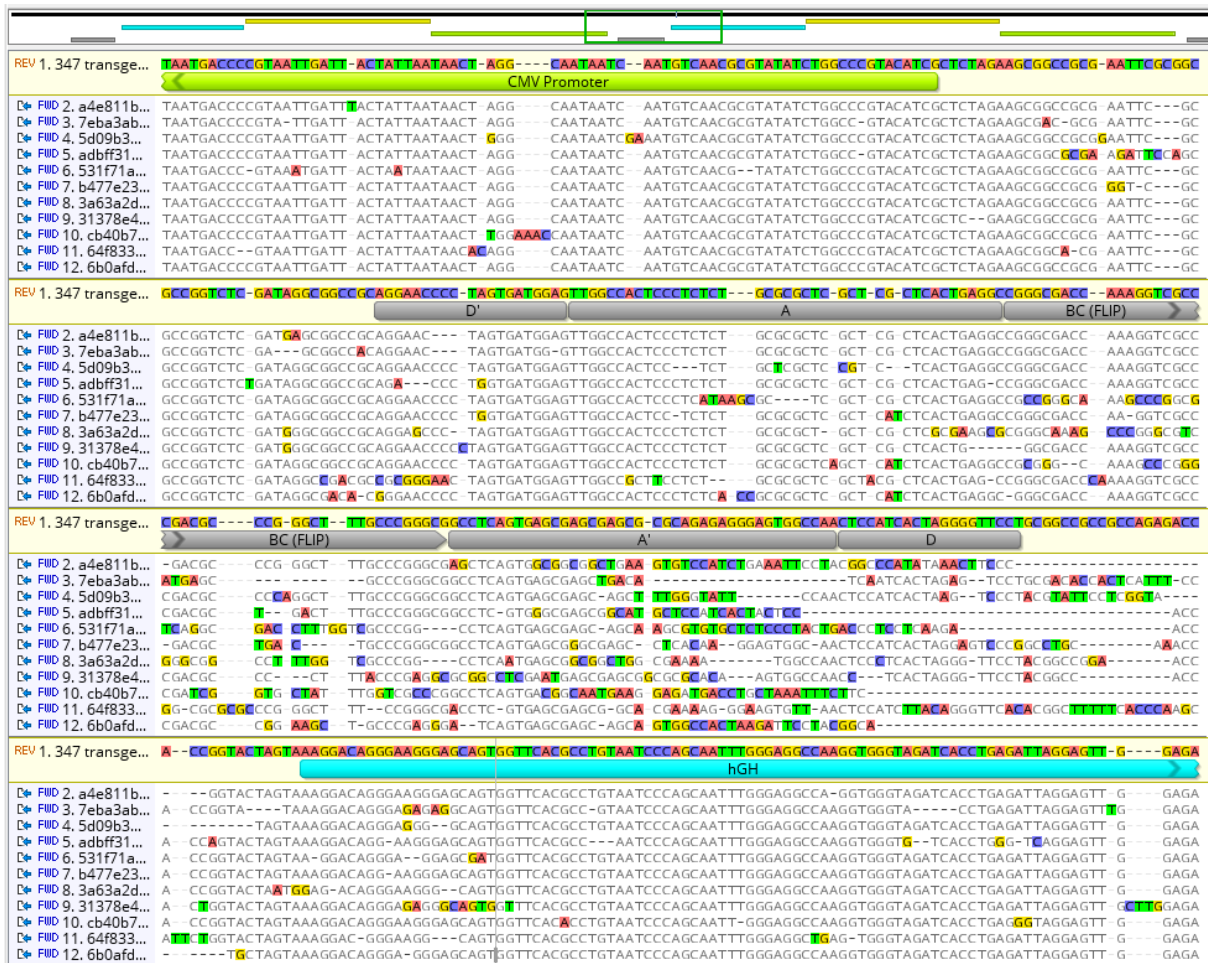

**Supplementary Figure S10.** Junction ITRs between genome-genome fusions have two D-sequences and sequencing quality drops downstream of the internal palindrome (BC). The 11 nt deletion present on producer plasmid level is absent in the genome-genome fusions (11 read examples mapped to *in silico* constructed genome-genome fusions).

## Supplementary Figure S11

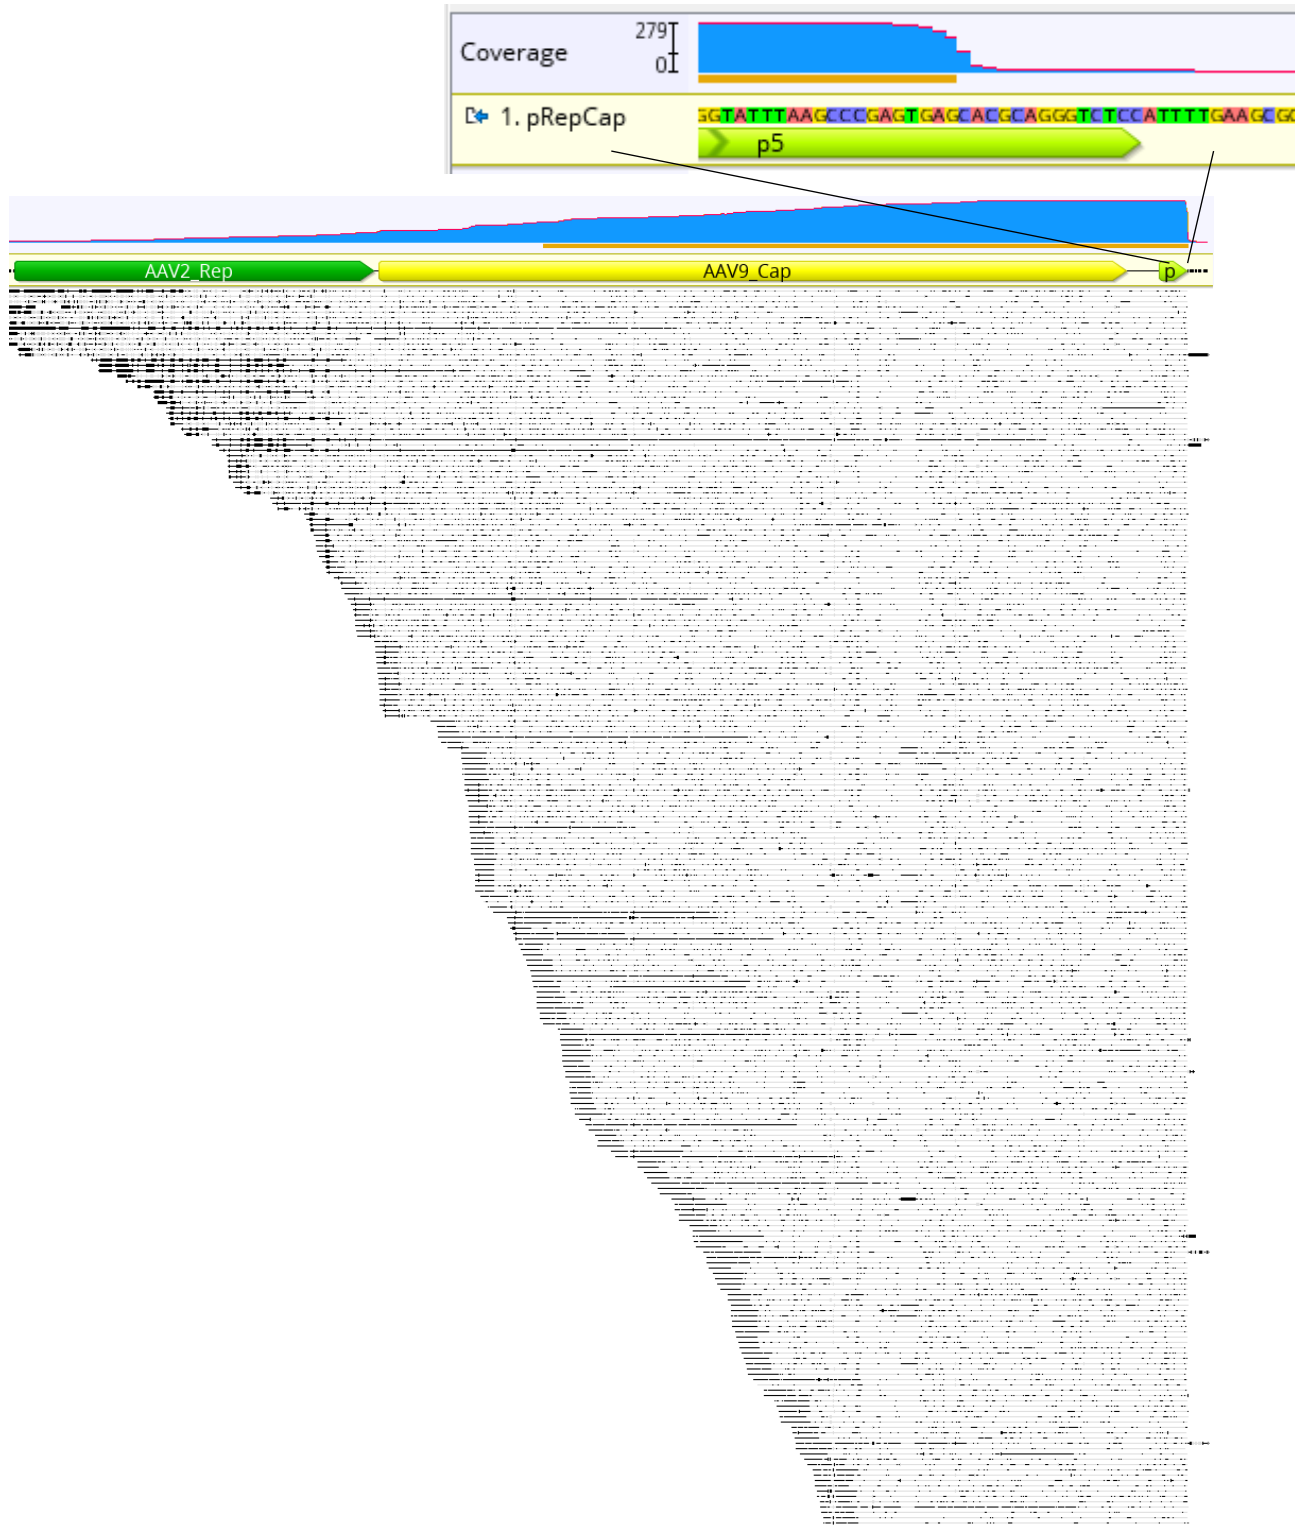

**Supplementary Figure S11.** p5 coverage drops sharply at position +12 of the promoter's TATA-box.



## Supplementary Figure S12

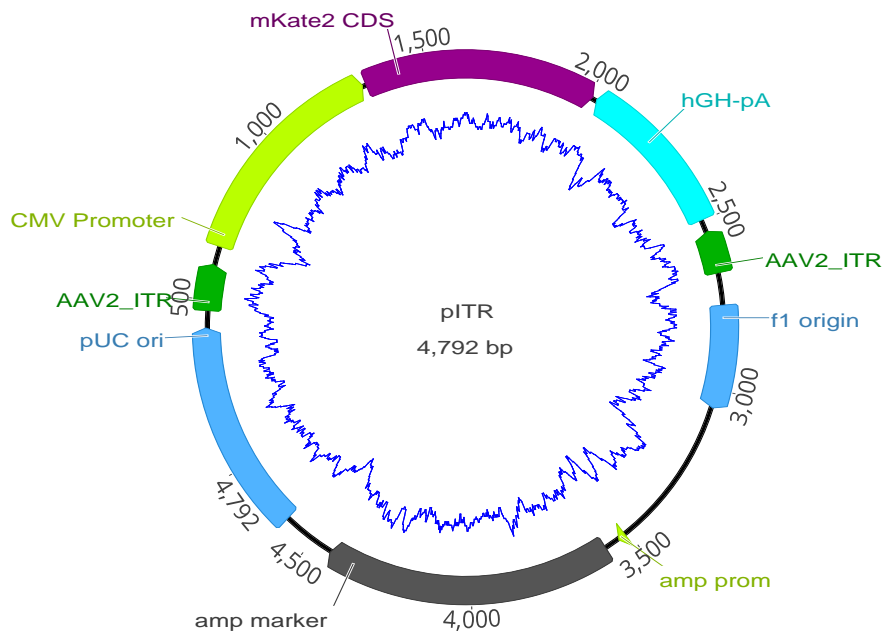

**Supplementary Figure S12.** Plasmid map of pITR (pUC19bb\_ITR\_EXS\_CMV\_mKate2\_hGH-pA) with GC content graph. The right ITR (proximate to the hGH-pA) harbors a 11 nt deletion.

## Supplementary Figure S13

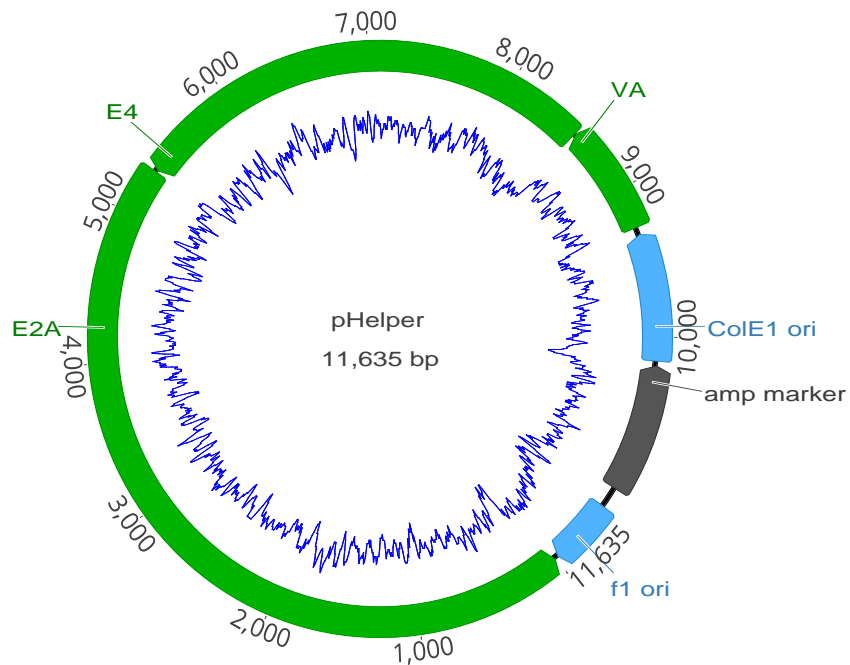

**Supplementary Figure S13.** Plasmid map of pHelper (Agilent Technologies) with GC content graph.

## Supplementary Figure S14

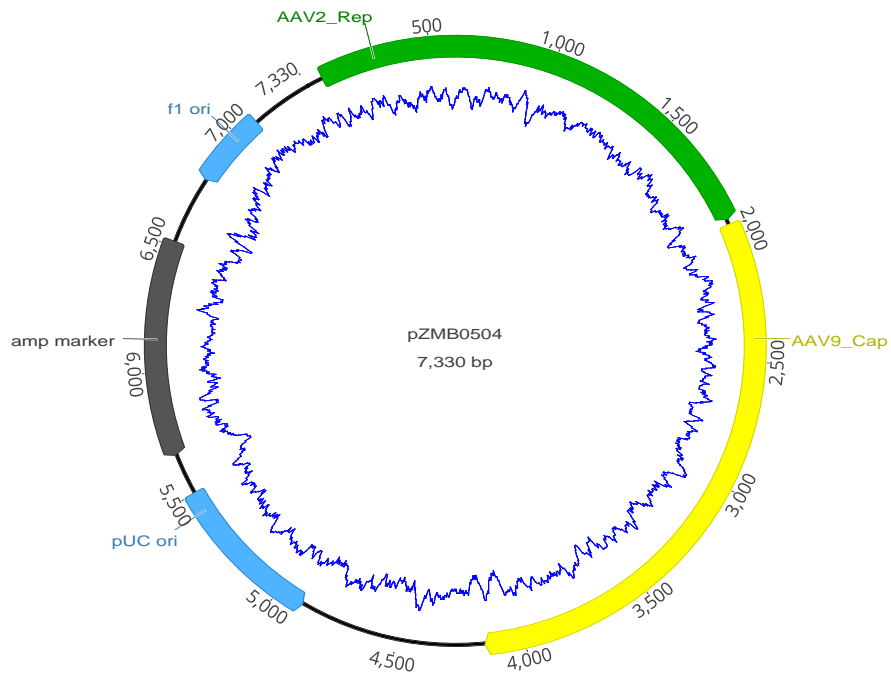

**Supplementary Figure S14.** Plasmid map of pRepCap (pRep2Cap9) with GC content graph.

## Supplementary Figure S15

1) **initial alignment to genome**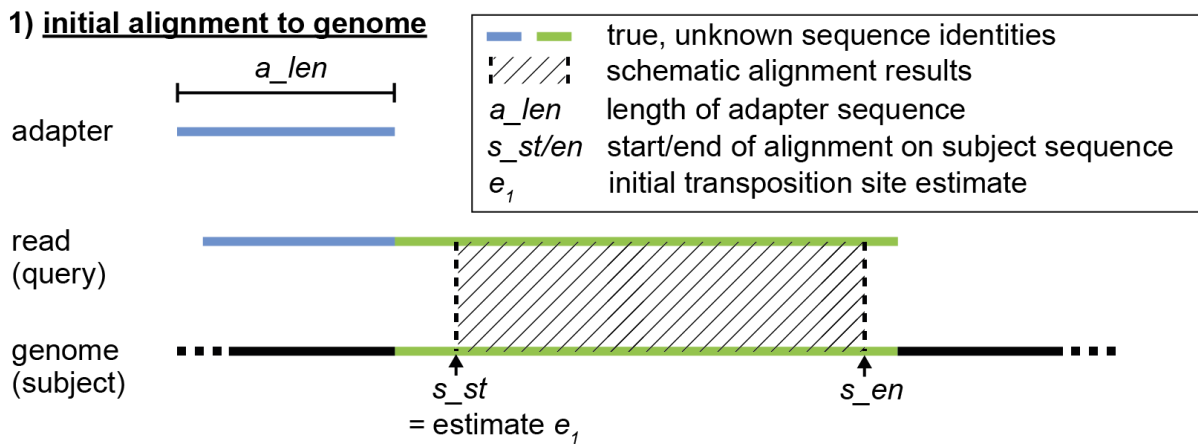2) **realignment to composite reference sequences**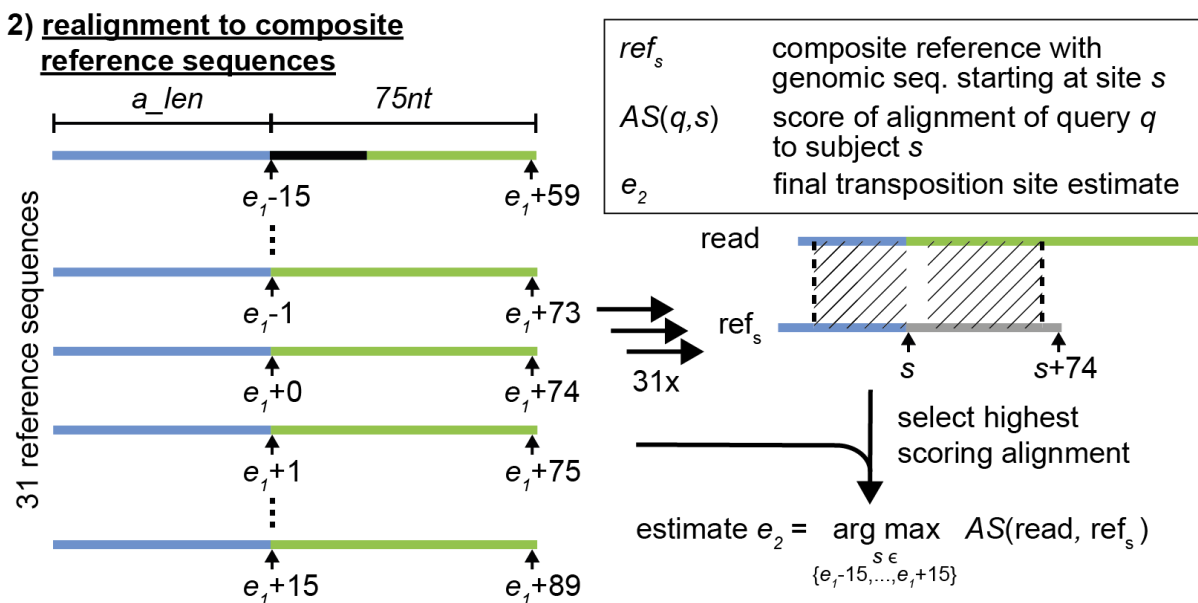

**Supplementary Figure S15.** Overview of the estimation of transposase insertion sites. 1) At first, each read is aligned to the genome using minimap2 and the map-on preset, rejecting secondary alignments and alignments shorter than 100 nt. The start of the aligned genomic sequence is taken as the initial estimate  $e_1$  of the transposase insertion site. 2) The estimate is refined by realigning the read against 31 composite reference sequences  $ref_s$ , with  $s \in \{e_1-15, \dots, e_1, \dots, e_1+15\}$ , each of which is composed of the adapter sequence followed by 75 nt genomic sequence starting at site  $s$  of the genome. The final transposase insertion site estimate is set to site  $s$  of the reference sequence  $ref_s$  that produces the highest alignment score.
